# Supplementary material
Source: ML conference proceedings conference paper supplement (https://proceedings.neurips.cc/paper_files/paper/2020/hash/eaae339c4d89fc102edd9dbdb6a28915-Abstract.html)
Supplement: Supplementary file [file eaae339c4d89fc102edd9dbdb6a28915-Supplemental.pdf]

# Supplementary Material of LAPAR

Wenbo Li<sup>1\*</sup> Kun Zhou<sup>2\*</sup> Lu Qi<sup>1</sup> Nianjuan Jiang<sup>2</sup> Jiangbo Lu<sup>2</sup> Jiaya Jia<sup>1,2</sup>

<sup>1</sup>The Chinese University of Hong Kong <sup>2</sup>Smartmore Technology

{wenboli, luqi, leojia}@cse.cuhk.edu.hk

{kun.zhou, nianjuan.jiang, jiangbo}@smartmore.com

## A. Additional Examples and Results of Image Super-Resolution

Here we show more visual examples on the Urban100 dataset in Figure 1. For the first example, it is clear that our LAPAR recovers more accurate structures while other methods [1, 2, 3, 4, 5] fail. For the second one, although other methods produce building transoms and mullions, our results are obviously sharper and straighter.

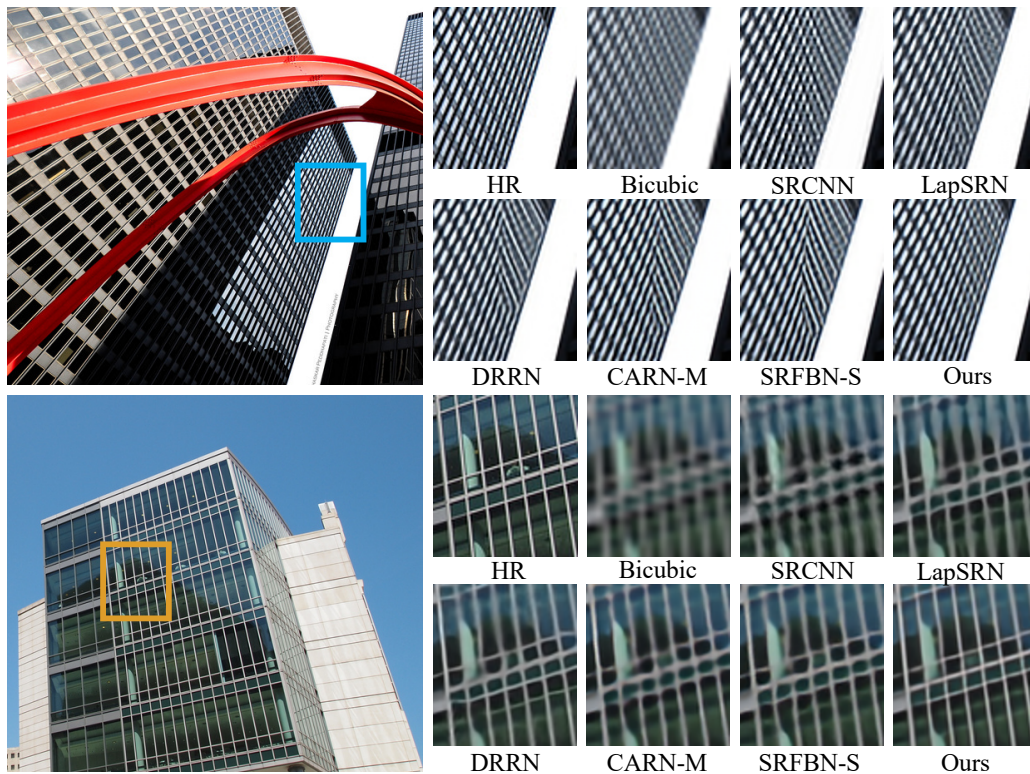

Figure 1: Image super-resolution examples on  $\times 2$  (top part) and  $\times 4$  (bottom part) scale of Urban100.

| Method  | Scale      | Params | MultiAdds | Set5        | Set14       | B100        | Urban100    | Manga109    |
|---------|------------|--------|-----------|-------------|-------------|-------------|-------------|-------------|
| LAPAR-A | $\times 2$ | 0.548M | 171G      | 37.95/38.01 | 33.58/33.62 | 32.17/32.19 | 32.01/32.10 | 38.41/38.67 |
|         | $\times 3$ | 0.594M | 114G      | 34.31/34.36 | 30.30/30.34 | 29.06/29.11 | 28.10/28.15 | 33.31/33.51 |
|         | $\times 4$ | 0.659M | 94G       | 32.10/32.15 | 28.53/28.61 | 27.56/27.61 | 26.01/26.14 | 30.22/30.42 |

Table 1: PSNR(dB) results of LAPAR-A. Red/blue: trained on DIV2K/DIV2K+Flickr2K.

\*Equal contribution

As shown in Table 1, we also show the results of our LAPAR trained only on DIV2K. LAPAR-A *still* achieves SOTA performance among lightweight SISR methods. Besides, we compare the results of RAISR [6] and LAPAR-A in Table 2, it is clear that our method outperforms RAISR [6] by a large margin.

| Method    | Scale | Set5        | Set14       |
|-----------|-------|-------------|-------------|
| RAISR [6] | ×2    | 36.15/0.951 | 32.13/0.902 |
|           | ×3    | 32.21/0.901 | 28.86/0.812 |
|           | ×4    | 29.84/0.848 | 27.00/0.738 |
| LAPAR-A   | ×2    | 38.01/0.961 | 33.62/0.918 |
|           | ×3    | 34.36/0.927 | 30.34/0.842 |
|           | ×4    | 32.15/0.894 | 28.61/0.782 |

Table 2: Comparison of RAISR [6] and LAPAR-A. The values represent PSNR(dB)/SSIM.

### B. Additional Examples of Image Denoising

As shown in Figure 2, more denoised examples of Set14 dataset are visualized. Compared with other methods [7, 8], for the first example, our LAPAR restores the original white background color nicely. At the same time, the details of all the pictures are better preserved in our results.

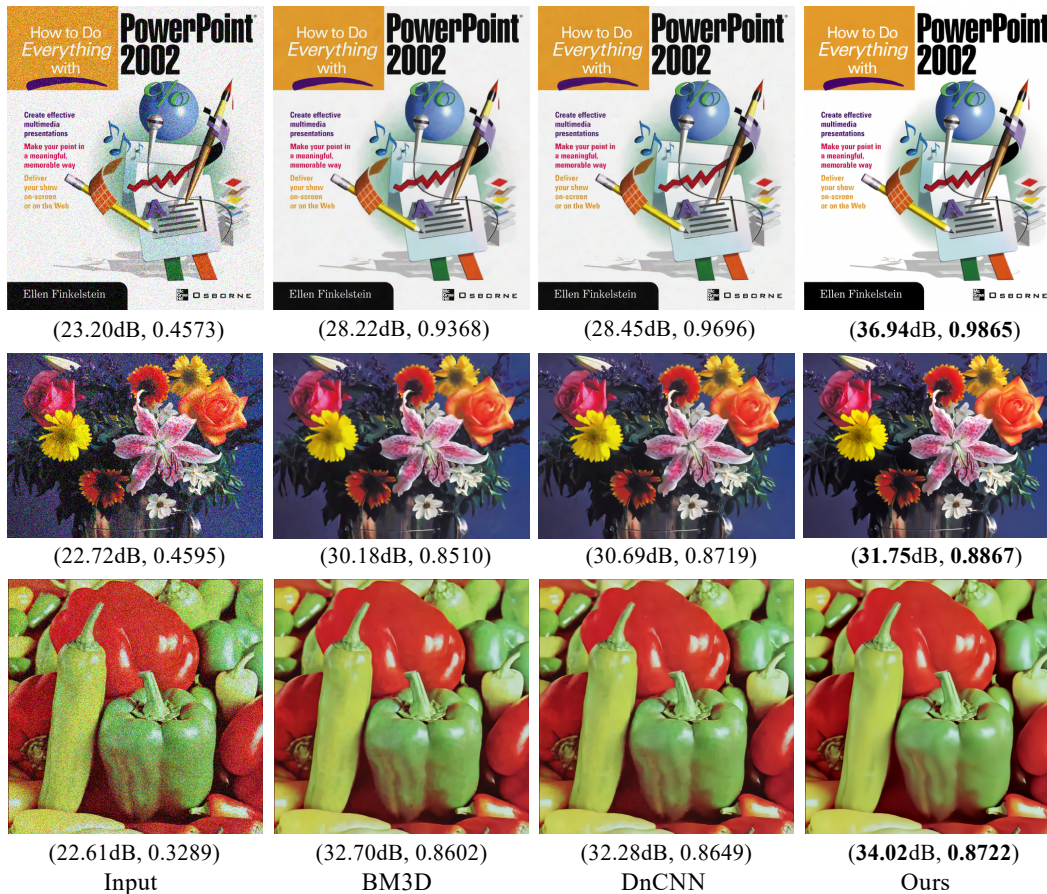

Figure 2: Image denoising examples of Set14. The values beneath images represent the PSNR(dB) and SSIM. The standard deviation of noise is set to 35.



### C. Additional Examples of Image Deblocking

As the testing cases illustrated in Figure 3, our LAPAR successfully removes the JPEG compression artifacts and achieves superior results compared with DnCNN [8].

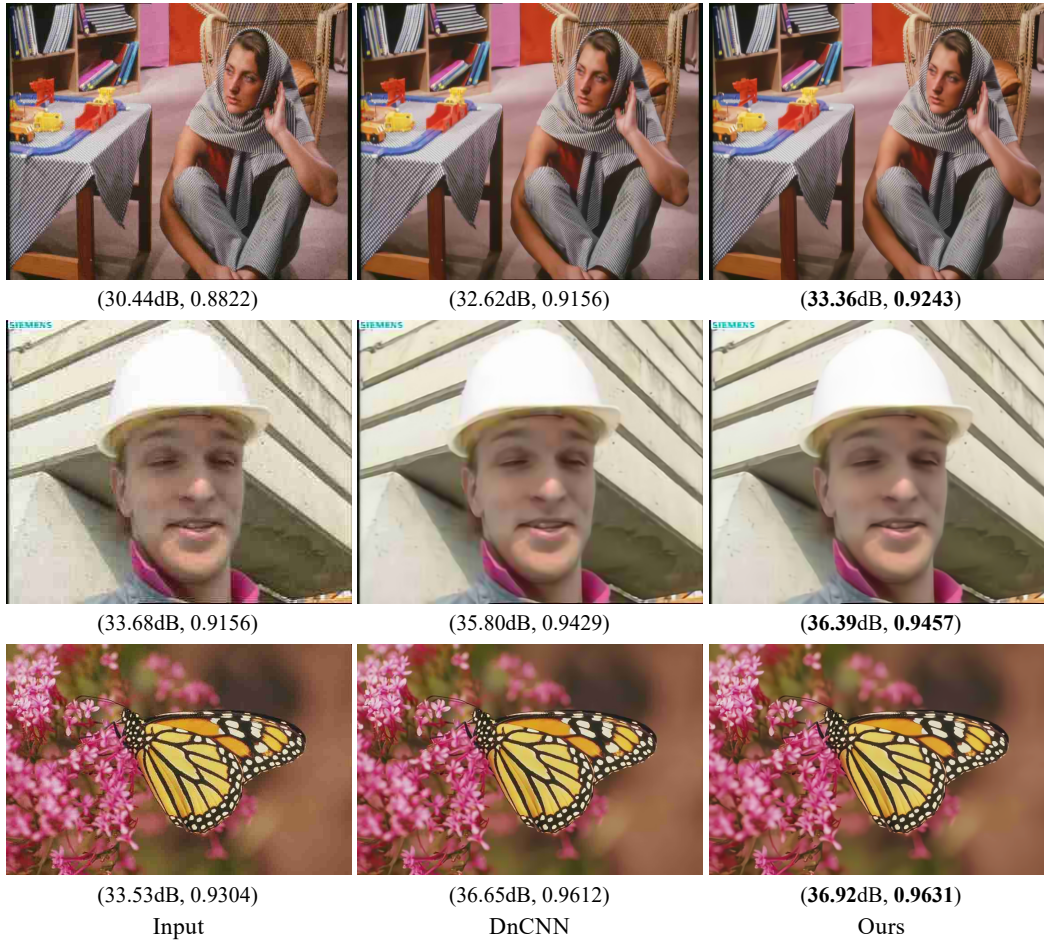

Figure 3: Image deblocking examples of Set14. The values beneath images represent the PSNR(dB) and SSIM. The JPEG quality is set to 20.

## References

- [1] Chao Dong, Chen Change Loy, Kaiming He, and Xiaoou Tang. Learning a deep convolutional network for image super-resolution. In *ECCV*, pages 184–199. Springer, 2014.
- [2] Wei-Sheng Lai, Jia-Bin Huang, Narendra Ahuja, and Ming-Hsuan Yang. Deep laplacian pyramid networks for fast and accurate super-resolution. In *CVPR*, pages 624–632, 2017.
- [3] Ying Tai, Jian Yang, and Xiaoming Liu. Image super-resolution via deep recursive residual network. In *CVPR*, pages 3147–3155, 2017.
- [4] Namhyuk Ahn, Byungkon Kang, and Kyung-Ah Sohn. Fast, accurate, and lightweight super-resolution with cascading residual network. In *ECCV*, pages 252–268, 2018.
- [5] Zhen Li, Jinglei Yang, Zheng Liu, Xiaomin Yang, Gwanggil Jeon, and Wei Wu. Feedback network for image super-resolution. In *CVPR*, pages 3867–3876, 2019.
- [6] Yaniv Romano, John Isidoro, and Peyman Milanfar. Raisr: Rapid and accurate image super resolution. *IEEE Transactions on Computational Imaging*, 3(1):110–125, 2016.
- [7] Kostadin Dabov, Alessandro Foi, Vladimir Katkovnik, and Karen Egiazarian. Image denoising by sparse 3-d transform-domain collaborative filtering. *TIP*, 16(8):2080–2095, 2007.
- [8] Kai Zhang, Wangmeng Zuo, Yunjin Chen, Deyu Meng, and Lei Zhang. Beyond a gaussian denoiser: Residual learning of deep cnn for image denoising. *TIP*, 26(7):3142–3155, 2017.
